# Supplementary material for: Bacterial Contamination of Equine Dentistry Equipment—Effect of Cleaning and Disinfection
Source: MDPI journal article supplement (doi:10.3390/ani11082320), 2021-08-05
Supplement: s1 [file s1]

Table S2. Sampling methods tested for sampling of handpieces, during pilot and main study. The samples were taken with Swab Samplers, copper wires formed to brushes, or a steel wire and all samples were placed in Swab Sampler tubes with letheen broth. Swab Sampler tubes were taken to the laboratory where they were vortexed and 1 ml broth was drawn from the sampling tube and put onto a 3M Petrifilm™ aerobic count (AC) Plate. All samples were analysed for total aerobic colony count (ACC).

| Study          | Sampling method              | Sampling surface                                                                                                    | Usability                                                                                  | Representativity                                                                                                                                                                                 |
|----------------|------------------------------|---------------------------------------------------------------------------------------------------------------------|--------------------------------------------------------------------------------------------|--------------------------------------------------------------------------------------------------------------------------------------------------------------------------------------------------|
| Pilot          | Copper wires formed to brush | Inside of the coupling LSH/SH/HS                                                                                    | Difficult to sample                                                                        | Most likely not representative samples due to difficulties sampling the surface with chosen sampling method. Copper is antibacterial which may influence samples.                                |
| Pilot          | Copper wires formed to brush | SH, seal in the connection area at the bottom of the head of SH where it connects with the sheath                   | Difficult to sample                                                                        | Most likely not representative samples due to difficulties sampling the surface with chosen sampling method. Copper is antibacterial which may influence samples.                                |
| Pilot          | Copper wires formed to brush | SH, internal surface of the connection area in the top part of the sheath of the SH where it connects with the head | Difficult to sample                                                                        | Most likely not representative samples due to difficulties sampling the surface with chosen sampling method. Copper is antibacterial which may influence samples.                                |
| Pilot          | Steel wire                   | Small holes in the top of the head of LHS                                                                           | Difficult to sample                                                                        | Most likely not representative samples due to difficulties sampling the surface with chosen sampling method.                                                                                     |
| Pilot          | Swab                         | SH, connection area at the bottom of the head of SH where it connects with the sheath                               | A bit difficult to sample                                                                  | Not representative surface to sample for internal surfaces.                                                                                                                                      |
| Pilot          | Swab                         | SH, external surface sheath                                                                                         | Possible to sample but can be integrated in sampling of the external surface of handpieces | Samples are most likely representative.                                                                                                                                                          |
| Pilot          | Swab                         | Burr surface                                                                                                        | Difficult to sample                                                                        | Most likely not representative samples due to difficulties sampling the surface with chosen sampling method.                                                                                     |
| Pilot and main | Swab of body                 | External surface HSH/LSH/SH                                                                                         | Possible to standardize sampling                                                           | Samples are most likely representative.                                                                                                                                                          |
| Pilot and main | Swab of shaft                | Shaft SH                                                                                                            | Possible to standardize sampling                                                           | Most likely samples are not representative for internal surfaces of SH since other parts of the shaft, e.g. the surgical gear are probably more contaminated and more difficult to decontaminate |
| Main           | Swab of coupling             | Coupling HSH                                                                                                        | Possible to standardize sampling                                                           | Probably representative but the method is not optimal for the surface of the coupling                                                                                                            |
| Main           | Swab of tunnel               | Coupling LSH                                                                                                        | Possible to standardize sampling                                                           | Most likely not representative since sampling is only possible in a small part of the tunnel. The sample is not representative for internal surfaces of the LSH.                                 |
