# Supplementary material for: Bacterial Contamination of Equine Dentistry Equipment—Effect of Cleaning and Disinfection
Source: MDPI journal article supplement (doi:10.3390/ani11082320), 2021-08-05
Supplement: s1 [file s1]

Table S1. Bacterial load on different parts of handpieces after dental procedures, after cleaning or disinfection and on handpieces taken from the cupboard in the dental care room. Colony forming units (CFU) is given in total CFU/surface sampled on handpieces. Other surfaces in the dental care room was sampled when the room was empty. Colony forming units (CFU) are given in CFU/cm<sup>2</sup>.

| Sampling surface                                                                                                    | Time of sampling                                                        | Cleaning substance                                                           | Disinfection substance                 | total CFU | CFU/cm <sup>2</sup> |
|---------------------------------------------------------------------------------------------------------------------|-------------------------------------------------------------------------|------------------------------------------------------------------------------|----------------------------------------|-----------|---------------------|
| Straight LSH, external surface                                                                                      | NA <sup>1</sup> , handpiece taken from cupboard in the dental care room | U <sup>2</sup> , but probably clinic's routine = wipe with damp wiping paper | U, but probably clinic's routine = IET | 223       | NA                  |
| Angled LSH 1, external surface                                                                                      | NA, handpiece taken from cupboard in the dental care room               | U, but probably clinic's routine = wipe with damp wiping paper               | U, but probably clinic's routine = IET | 420       | NA                  |
| Angled LSH 2, external surface                                                                                      | NA, handpiece taken from cupboard in the dental care room               | U, but probably clinic's routine = wipe with damp wiping paper               | U, but probably clinic's routine = IET | 520       | NA                  |
| Straight LSH, inside of the coupling                                                                                | NA, handpiece taken from cupboard in the dental care room               | U, but probably clinic's routine = wipe with damp wiping paper               | U, but probably clinic's routine = IET | 2         | NA                  |
| Angled LSH 1, inside of the coupling                                                                                | NA, handpiece taken from cupboard in the dental care room               | U, but probably clinic's routine = wipe with damp wiping paper               | U, but probably clinic's routine = IET | 16        | NA                  |
| Angled LSH 2, inside of the coupling                                                                                | NA, handpiece taken from cupboard in the dental care room               | U, but probably clinic's routine = wipe with damp wiping paper               | U, but probably clinic's routine = IET | 3         | NA                  |
| Straight LSH, small holes in top of the head                                                                        | NA, handpiece taken from cupboard in the dental care room               | U, but probably clinic's routine = wipe with damp wiping paper               | U, but probably clinic's routine = IET | 1         | NA                  |
| Burr surface                                                                                                        | NA, handpiece taken from cupboard in the dental care room               | U, but probably clinic's routine = wipe with damp wiping paper               | U, but probably clinic's routine = IET | 7         | NA                  |
| Burr surface                                                                                                        | After dental procedure                                                  | NA                                                                           | NA                                     | 400       | NA                  |
| SH, external surface                                                                                                | After dental procedure                                                  | NA                                                                           | NA                                     | 1100      | NA                  |
| SH, shaft                                                                                                           | After dental procedure                                                  | NA                                                                           | NA                                     | 100       | NA                  |
| SH, connection area at the bottom of the head of SH where it connects with the sheath                               | After dental procedure                                                  | NA                                                                           | NA                                     | 209       | NA                  |
| SH, seal in the connection area at the bottom of the head of SH where it connects with the sheath                   | After dental procedure                                                  | NA                                                                           | NA                                     | 43        | NA                  |
| SH, inside of the coupling                                                                                          | After dental procedure                                                  | NA                                                                           | NA                                     | 1         | NA                  |
| SH, shaft                                                                                                           | After decontamination and lubrication                                   | None but wipe with damp wiping paper                                         | IET <sup>3</sup>                       | 27        | NA                  |
| SH, internal surface of the head of SH                                                                              | After decontamination and lubrication                                   | None but wipe with damp wiping paper                                         | IET                                    | 26        | NA                  |
| SH, connection area at the bottom of the head of SH where it connects with the sheath                               | After decontamination and lubrication                                   | None but wipe with damp wiping paper                                         | IET                                    | 160       | NA                  |
| SH, internal surface of the connection area in the top part of the sheath of the SH where it connects with the head | After decontamination and lubrication                                   | None but wipe with damp wiping paper                                         | IET                                    | 5         | NA                  |
| SH, external surface sheath                                                                                         | After decontamination and lubrication                                   | None but wipe with damp wiping paper                                         | IET                                    | 224       | NA                  |

| Time of sampling                      | Cleaning substance                                          | Disinfection substance | total CFU | CFU/cm <sup>2</sup> |                   |
|---------------------------------------|-------------------------------------------------------------|------------------------|-----------|---------------------|-------------------|
| Head support                          | NA, sampling took place when the dental care room was empty | U                      | U         | NA                  | TNTC <sup>4</sup> |
| Workbench                             | NA, sampling took place when the dental care room was empty | U                      | U         | NA                  | 0,12              |
| Workbench adjacent to washing-up sink | NA, sampling took place when the dental care room was empty | U                      | U         | NA                  | 0,48              |
| Washing-up sink adjacent to drain     | NA, sampling took place when the dental care room was empty | U                      | U         | NA                  | 2,15              |
| Metal trolley                         | NA, sampling took place when the dental care room was empty | U                      | U         | NA                  | 4,7               |
| Negative control                      | NA                                                          | NA                     | NA        | 0                   | NA                |

<sup>1</sup>. Not applicable, <sup>2</sup>. Unknown, <sup>3</sup>. Isopropanol and ethanol with tensid, <sup>4</sup>. Too numerous to count
